# Supplementary material for: Quartz Tuning Fork Sensor-Based Dosimetry for Sensitive Detection of Gamma Radiation
Source: MDPI journal article supplement (doi:10.3390/ma14227035), 2021-11-19
Supplement: s1 [file s1]

Supplementary File

# Quartz Tuning Fork Sensor-Based Dosimetry for Sensitive Detection of Gamma Radiation

Nadyah Alanazi <sup>1,†</sup>, Abdullah N. Alodhayb <sup>1,2,3,†</sup>, Atheer Almutairi <sup>1</sup>, Hanan Alshehri <sup>1</sup>, Sarah AlYemni <sup>1</sup>, Ghadah Alsowaygh <sup>1</sup>, Sabaa Abdulmawla <sup>1</sup>, Khaled Shamma <sup>1,3</sup>, Hamad Albrithen <sup>1,2,3,4</sup>, Muthumareeswaran Muthuramamoorthy <sup>3</sup> and Aljawhara H. Almuqrin <sup>5,\*</sup>

<sup>1</sup> Department of Physics and Astronomy, College of Science, King Saud University, Riyadh 11451, Saudi Arabia; nalenazi@ksu.edu.sa (N.A.); aalodhayb@ksu.edu.sa (A.N.A.); 438202676@student.ksu.edu.sa (A.A.); hoalshehri@KSU.EDU.SA (H.A.); salyemni@KSU.EDU.SA (S.A.); galsowaygh@ksu.edu.sa (G.A.); stabdulmawla@ksu.edu.sa (S.A.); khaledshamma@hotmail.com (K.S.); brithen@ksu.edu.sa (H.A.)

<sup>2</sup> Research Chair for Tribology, Surface, and Interface Sciences, Department of Physics and Astronomy, College of Science, King Saud University, Riyadh 11451, Saudi Arabia

<sup>3</sup> King Abdullah Institute for Nanotechnology, King Saud University, Riyadh 11451, Saudi Arabia; mramamoorthy@ksu.edu.sa

<sup>4</sup> K.A.CARE Energy Research and Innovation Center at Riyadh, Riyadh 11451, Saudi Arabia

<sup>5</sup> Department of Physics, College of Science, Princess Nourah bint Abdulrahman University, Riyadh, Saudi Arabia

\* Correspondence: ahalmoqrin@pnu.edu.sa

† Authors equally contributed to this work.

**Citation:** Alanazi, N.; Alodhayb, A.; Almutairi, A.; Alshehri, H.; AlYemni, S.; Alsowaygh, G.; Abdulmawla, S.; Shamma, K.; Albrithen, H.; Muthuramamoorthy, M.; et al. Quartz Tuning Fork Sensor-Based Dosimetry for Sensitive Detection of Low-Dose Gamma Radiation. *Materials* **2021**, *14*, 7035. <https://doi.org/10.3390/ma14227035>

Academic Editor: Qiang Xu, Salvatore Tudisco, Francesco Caridi, Valery V. Tuchin

Received: 19 August 2021

Accepted: 15 November 2021

Published: 19 November 2021

**Publisher's Note:** MDPI stays neutral with regard to jurisdictional claims in published maps and institutional affiliations.

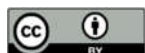

**Copyright:** © 2021 by the authors. Licensee MDPI, Basel, Switzerland. This article is an open access article distributed under the terms and conditions of the Creative Commons Attribution (CC BY) license (<http://creativecommons.org/licenses/by/4.0/>).

### Statistical Analysis

The number of experimental runs required to run the experiment was designed using the Taguchi L9 design. From the literature, among the dominant parameters of detecting radiation sources from gamma, time and dose played an vital role in contributing the output response resonance frequency. So, time and dose have been considered in this L9 Taguchi experiment.

**Table S1.** Design of Experiment with Main Variables.

| Input Parameters | Levels      | Actual Values    |
|------------------|-------------|------------------|
| Time             | (−1, 0, +1) | (0, 1, 2.5)      |
| Dose             | (−1, 0, +1) | (0, 7.64, 19.10) |

### Experimental Data Sets

**Table S2.** Taguchi Experimental Design Test Matrix (L9) for Detection of gamma radiation as a function of dose and time duration.

| Time (hr) | Dose (μGy) | QTFg  | QTFgl | QTF   |
|-----------|------------|-------|-------|-------|
| 0.0       | 0.00       | 32.62 | 32.73 | 32.16 |
| 0.0       | 7.64       | 32.63 | 32.76 | 32.18 |
| 0.0       | 19.10      | 32.64 | 32.77 | 32.19 |
| 1.0       | 0.00       | 32.65 | 32.78 | 32.20 |
| 1.0       | 7.64       | 32.67 | 32.79 | 32.21 |
| 1.0       | 19.10      | 32.69 | 32.81 | 32.22 |
| 2.5       | 0.00       | 32.71 | 32.82 | 32.24 |
| 2.5       | 7.64       | 32.73 | 32.84 | 32.25 |
| 2.5       | 19.10      | 32.75 | 32.86 | 32.26 |

### Results

The regression equation (1) of  

$$QTFg = 32.6767 - 0.04667 \text{ Time (hr)}_{0.0} - 0.00667 \text{ Time (hr)}_{1.0} + 0.05333 \text{ Time (hr)}_{2.5} - 0.01667 \text{ Dose (}\mu\text{Gy)}_{0.00} + 0.00000 \text{ Dose (}\mu\text{Gy)}_{7.64} + 0.01667 \text{ Dose (}\mu\text{Gy)}_{19.10}$$

**Table S3.** ANOVA for resonance frequency response of QTFg vs time (hr), dose (μGy) level.

| Source     | df | Sum of Squares | Mean of Squares | F- Value | P-Value           |
|------------|----|----------------|-----------------|----------|-------------------|
| Time (hr)  | 2  | 0.015200       | 0.007600        | 228.00   | 0.000 Significant |
| Dose (μGy) | 2  | 0.001667       | 0.000833        | 25.00    | 0.005 Significant |

The regression equation (2) of  

$$QTFgl = 32.7956 - 0.04222 \text{ Time (hr)}_{0.0} - 0.00222 \text{ Time (hr)}_{1.0} + 0.04444 \text{ Time (hr)}_{2.5} - 0.01889 \text{ Dose (}\mu\text{Gy)}_{0.00} + 0.00111 \text{ Dose (}\mu\text{Gy)}_{7.64} + 0.01778 \text{ Dose (}\mu\text{Gy)}_{19.10}$$

**Table S4.** ANOVA for resonance frequency response of QTFgl vs time (hr), dose (μGy) level.

| Source     | df | Sum of Squares | Mean of Squares | F- Value | P-Value           |
|------------|----|----------------|-----------------|----------|-------------------|
| Time (hr)  | 2  | 0.011289       | 0.005644        | 203.20   | 0.000 Significant |
| Dose (μGy) | 2  | 0.002022       | 0.001011        | 36.40    | 0.003 Significant |

The regression equation (3) of  

$$QTF = 32.2122 - 0.03556 \text{ Time (hr)}_{0.0} - 0.00222 \text{ Time (hr)}_{1.0} + 0.03778 \text{ Time (hr)}_{2.5} - 0.01222 \text{ Dose (}\mu\text{Gy)}_{0.00} + 0.00111 \text{ Dose (}\mu\text{Gy)}_{7.64} + 0.01111 \text{ Dose (}\mu\text{Gy)}_{19.10}$$

**Table S5.** ANOVA for resonance frequency response of QTF vs time (hr), dose ( $\mu\text{Gy}$ ) level.

| Source                  | df | Sum of Squares | Mean of Squares | F- Value | P-Value           |
|-------------------------|----|----------------|-----------------|----------|-------------------|
| Time (hr)               | 2  | 0.008089       | 0.004044        | 364.00   | 0.000 Significant |
| Dose ( $\mu\text{Gy}$ ) | 2  | 0.000822       | 0.000411        | 37.00    | 0.003 Significant |

From the ANOVA tables, the results inferred that the parameters with p value  $<0.05$  is considered to be the significant and actively contributed to the experimental responses. The model fit found to be linear and there is no interaction exists between the two input parameters. From this observation, it is evident that both input parameters efficiently contributed with its individual ability towards the active responses under desirability 1. In addition, the predicted all analysis  $R^2$  value ( $99.42 \pm 0.3$ ) is closely matches with adjusted  $R^2$  ( $96.72 \pm 0.1$ ) which makes the data scatters of actual and predicted as very close fit data.

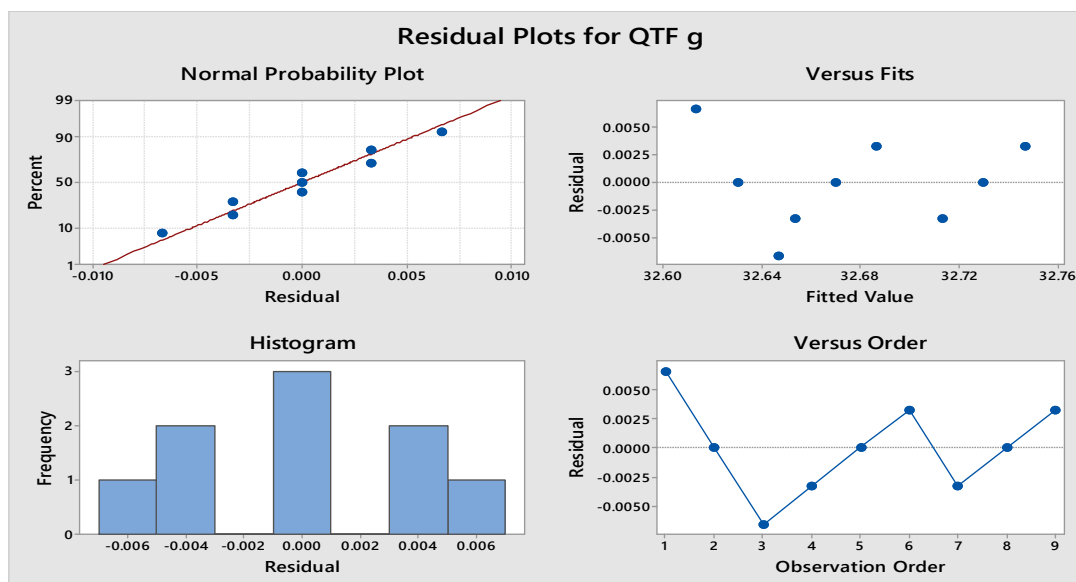**Figure S1.** Residual Plots for QTF : resonance frequency vs time (hr), Dose ( $\mu\text{Gy}$ ) level of gamma source.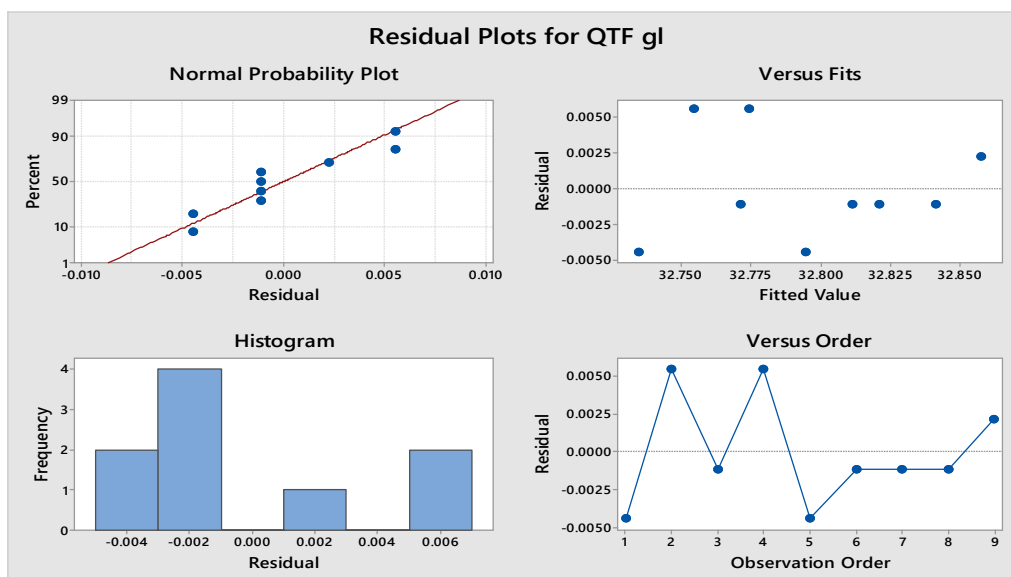**Figure S2.** Residual Plots for QTFgl : resonance frequency vs time (hr), Dose ( $\mu\text{Gy}$ ) level of gamma source.

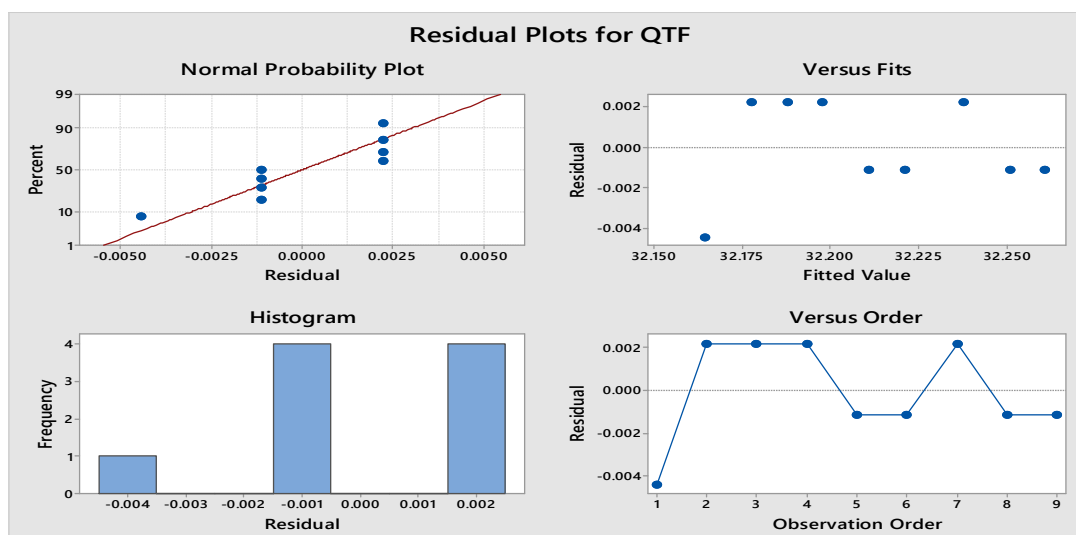

Figure S3. Residual Plots for QTFgl : resonance frequency vs time (hr), Dose ( $\mu$ Gy) level of gamma source.

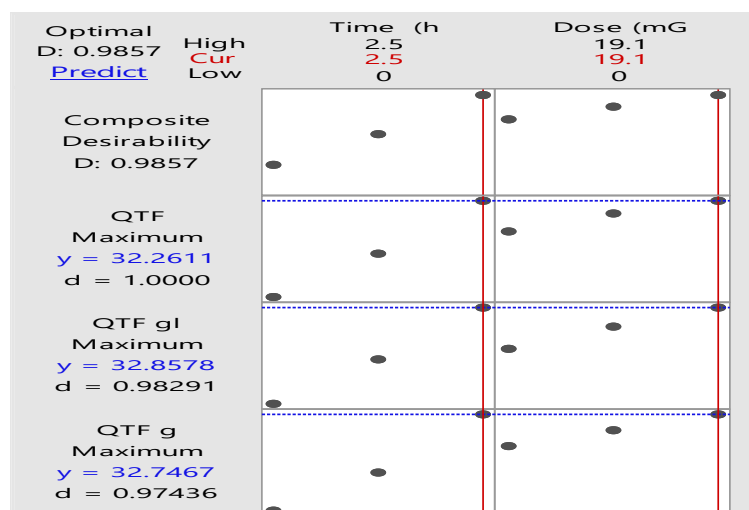

Figure S4. Response optimizer for time, dose level vs resonance frequency.

From the response optimizer, it was concluded that increase in the time and dose obviously increasing the frequency of the selected QTF systems (QTFgl, QTFg and QTF).
